# Supplementary material
Source: PubMed Central journal article supplement (PMC6084884)
Supplement: EHP2754.s001.acco.pdf [file EHP2754.s001.acco.pdf]

**Note to readers with disabilities:** *EHP* strives to ensure that all journal content is accessible to all readers. However, some figures and Supplemental Material published in *EHP* articles may not conform to [508 standards](#) due to the complexity of the information being presented. If you need assistance accessing journal content, please contact [ehp508@niehs.nih.gov](mailto:ehp508@niehs.nih.gov). Our staff will work with you to assess and meet your accessibility needs within 3 working days.

### **Supplemental Material**

#### **Prenatal Exposure to Perfluoroalkyl Substances and IQ Scores at Age 5; a Study in the Danish National Birth Cohort**

Zeyan Liew, Beate Ritz, Cathrine Carlsen Bach, Robert F. Asarnow, Bodil Hammer Bech, Ellen A. Nohr, Rossana Bossi, Tine Brink Henriksen, Eva Cecilie Bonefeld-Jørgensen, and Jørn Olsen

#### **Table of Contents**

**Figure S1.** Selection of the LDPS study population from the DNBC.

**Figure S2.** Adjusted difference in IQ scores in boys and girls at age five according to prenatal PFAS levels (per natural-log ng/ml increase).

**Table S1.** Comparison of the characteristics for those invited and those who participated in the LDPS-DNBC cohort.

**Table S2.** PFAS concentrations in the LDPS cohort compared with data from a previous DNBC sample and the U.S. NHANES data reported as median concentration (25<sup>th</sup>-75<sup>th</sup> percentiles) in ng/ml.

**Table S3.** Distributions of selected PFASs by study characteristics in the LDPS-DNBC cohort (N=1,592).

**Table S4.** Adjusted difference of child IQ scores at age five according to prenatal PFAS (per natural-log ng/ml increase), stratified by parity.

**Table S5.** Adjusted difference of child IQ scores at age five according to prenatal PFAS (per natural-log ng/ml increase), stratified by maternal socio-economic status (SES).

**Table S6.** Mean differences in IQ scores in 1,592 children at age five according to prenatal PFAS level quartiles.

**Table S7.** Adjusted difference of child IQ scores according to prenatal PFAS (per natural-log ng/ml increase), comparing models accounting for selection factors.

**Table S8.** Adjusted difference of child IQ scores at age five according to prenatal PFAS (per natural-log ng/ml increase), additionally adjusting for birth year.

**Table S9.** Adjusted difference of child IQ scores at age five according to prenatal PFAS (per natural-log ng/ml increase), excluding blood samples that were subjected to processing delay.

## **Reference**

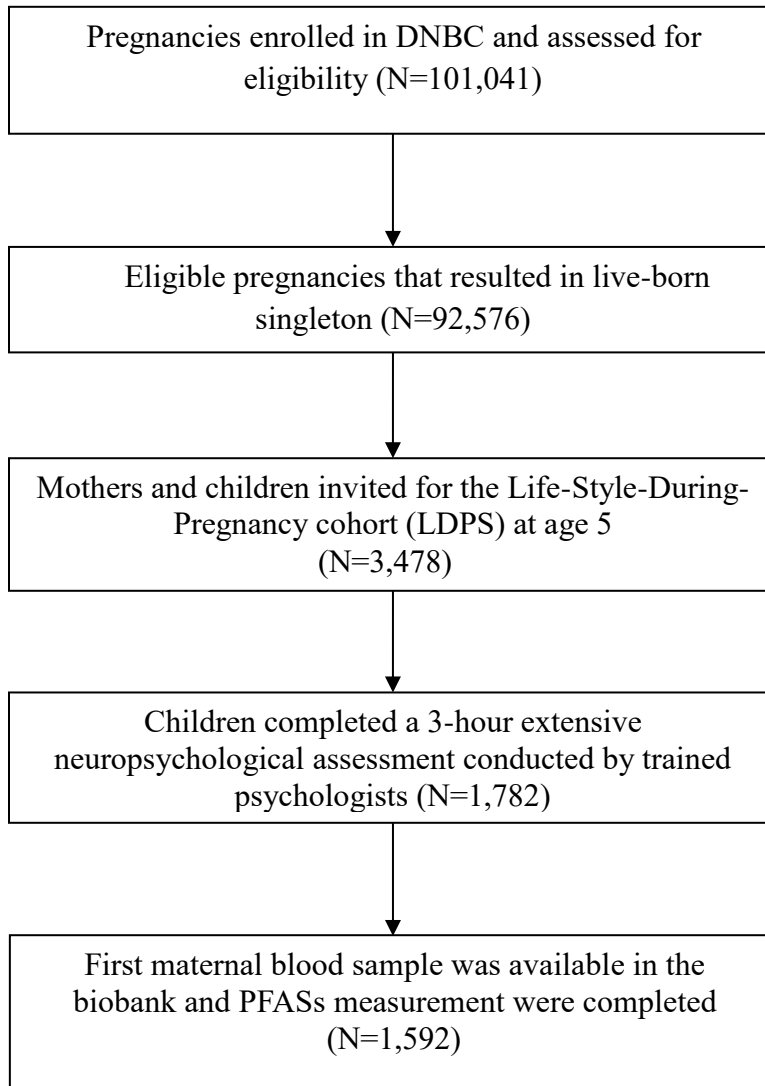

**Figure S1. Selection of the LDPS study population from the DNBC**

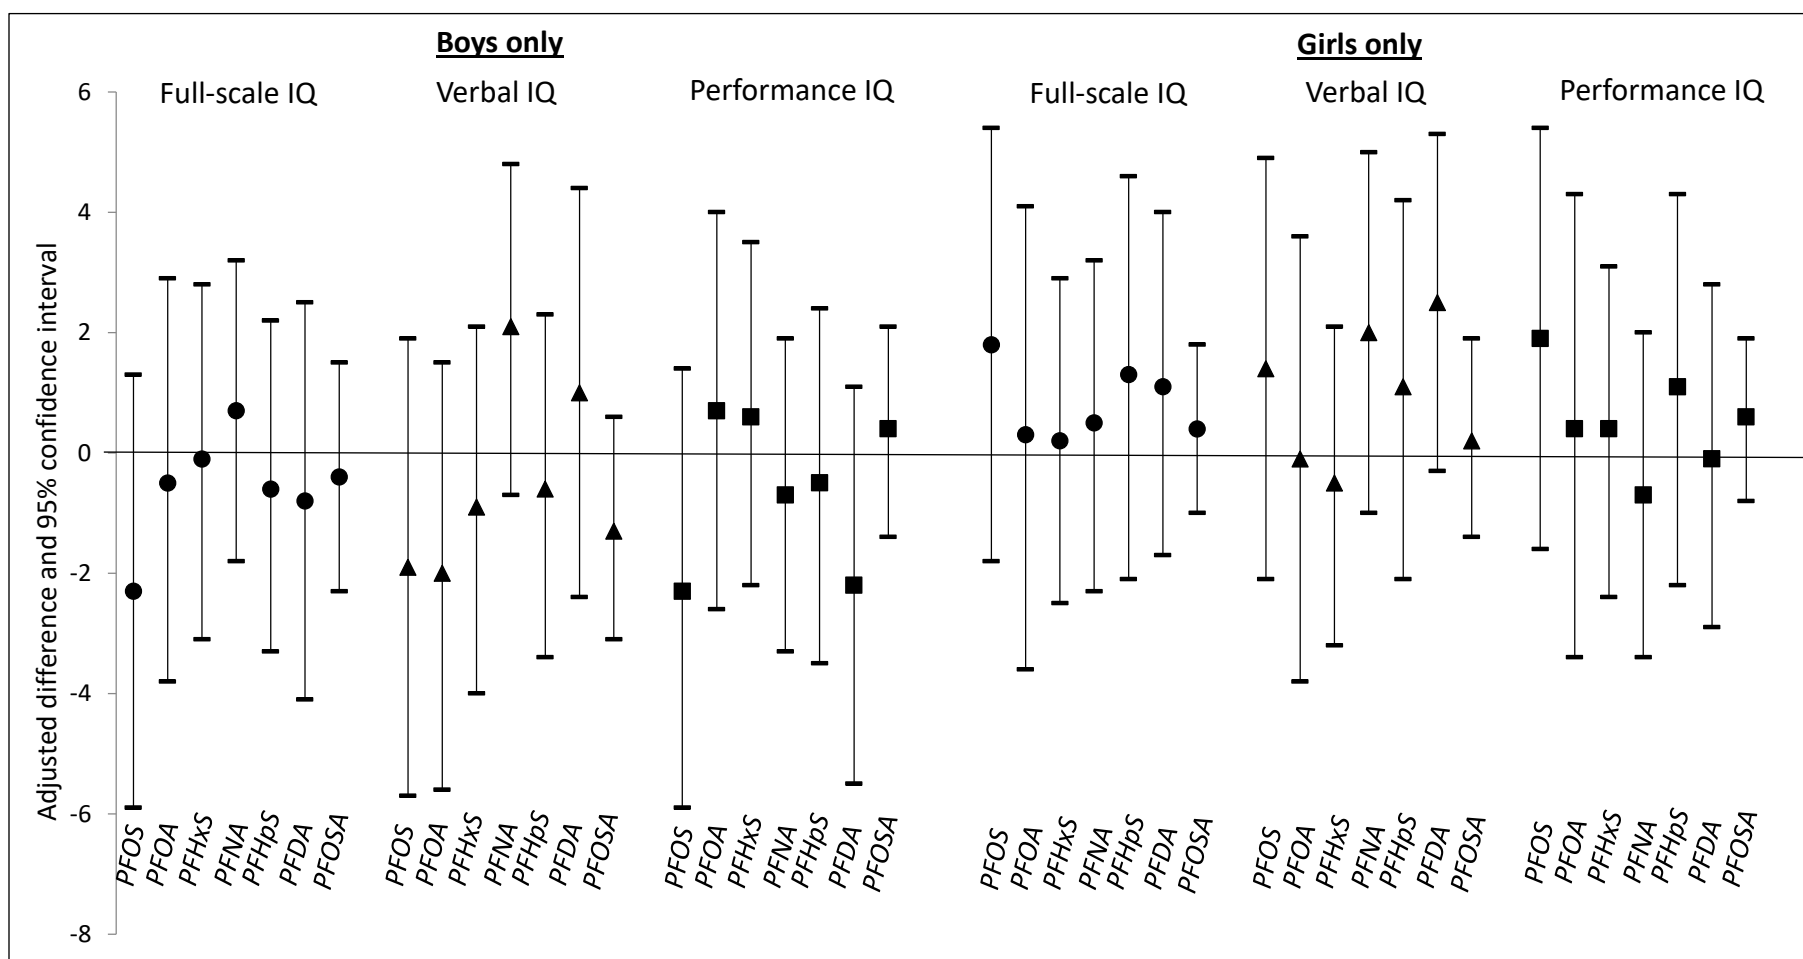

**Figure S2. Adjusted difference in IQ scores in boys and girls at age five according to prenatal PFAS levels (per natural-log ng/ml increase).** 831 boys and 761 girls were analyzed for each of the PFASs and outcome scores. Multivariable linear regression modeling was used to estimate the expected difference in IQ scores. Estimates are adjusted for maternal age at child birth, parity, maternal socio-economic status, maternal IQ, maternal smoking during pregnancy, maternal alcohol consumption during pregnancy, maternal pre-pregnancy BMI, and gestational week of blood draw. Abbreviations: IQ, intelligence quotient; PFAS, perfluoroalkyl substances; PFOS, perfluorooctane sulfonate; PFOA, perfluorooctanoic acid; PFHxS, perfluorohexan sulfonate; PFNA, perfluorononanoic acid; PFHpS, perfluoroheptane sulfonate; PFDA, perfluorodecanoic acid; PFOSA, perfluorooctanesulfonic acid.

**Table S1 Comparison of the characteristics for those invited and those who participated in the LDPS-DNBC cohort**

|                                                      | <b>Invited in the LDPS (N=3,478)</b> | <b>Participated in the LDPS (N=1,782)</b> | <b>Participated in the LDPS and PFASs measured (N=1,592)</b> |
|------------------------------------------------------|--------------------------------------|-------------------------------------------|--------------------------------------------------------------|
|                                                      | %                                    | %                                         | %                                                            |
| <b>Child's sex</b>                                   |                                      |                                           |                                                              |
| Female                                               | 48.6                                 | 48.1                                      | 47.8                                                         |
| Male                                                 | 51.3                                 | 51.8                                      | 52.2                                                         |
| <b>Preterm birth (&lt;37 weeks)</b>                  | 3.6                                  | 2.7                                       | 2.6                                                          |
| <b>Low birth weights (&lt;2500 gram)</b>             | 2.7                                  | 2.1                                       | 2.2                                                          |
| <b>Maternal age at delivery</b>                      |                                      |                                           |                                                              |
| ≤ 24                                                 | 10.5                                 | 8.6                                       | 8.7                                                          |
| 25-29                                                | 36.6                                 | 35.7                                      | 35.3                                                         |
| 30-34                                                | 36.1                                 | 38.4                                      | 38.8                                                         |
| ≥ 34                                                 | 16.7                                 | 17.2                                      | 17.2                                                         |
| <b>Parity</b>                                        |                                      |                                           |                                                              |
| 0                                                    | 48.1                                 | 50.9                                      | 50.3                                                         |
| ≥1                                                   | 49.2                                 | 49.1                                      | 49.7                                                         |
| <b>Socio-economic status</b>                         |                                      |                                           |                                                              |
| High                                                 | 65.0                                 | 71.5                                      | 71.0                                                         |
| Medium                                               | 30.1                                 | 25.3                                      | 25.9                                                         |
| Low                                                  | 4.2                                  | 2.7                                       | 2.7                                                          |
| Missing                                              | 0.7                                  | 0.5                                       | 0.4                                                          |
| <b>Maternal alcohol consumption during pregnancy</b> |                                      |                                           |                                                              |
| Never                                                | 49.7                                 | 47.7                                      | 47.5                                                         |
| 1-4 glass(es) per week                               | 39.6                                 | 41.1                                      | 41.1                                                         |
| more than 4 glasses per week                         | 10.6                                 | 11.2                                      | 11.4                                                         |
| <b>Maternal smoking during pregnancy</b>             |                                      |                                           |                                                              |
| No                                                   | 66.6                                 | 68.4                                      | 68.9                                                         |
| Yes                                                  | 33.3                                 | 31.6                                      | 31.1                                                         |
| <b>Maternal pre-pregnancy body mass index (BMI)</b>  |                                      |                                           |                                                              |
| <18.5                                                | 4.0                                  | 3.6                                       | 3.8                                                          |
| 18.5-24.9                                            | 66.6                                 | 69.2                                      | 68.7                                                         |
| 25.0-29.9                                            | 19.5                                 | 18.0                                      | 18.3                                                         |
| ≥30                                                  | 8.2                                  | 7.1                                       | 7.3                                                          |
| Missing                                              | 1.7                                  | 2.1                                       | 1.9                                                          |

Abbreviations: LDPS, Lifestyle during pregnancy study; DNBC, Danish National Birth Cohort.

**Table S2 PFAS concentrations in the LDPS cohort compared with data from a previous DNBC sample and the U.S. NHANES data reported as median concentration (25<sup>th</sup>-75<sup>th</sup> percentiles) in ng/ml.**

| <b>Study</b>                       | <b>PFOS</b>      | <b>PFOA</b>   | <b>PFHxS</b>  | <b>PFNA</b>   |
|------------------------------------|------------------|---------------|---------------|---------------|
| DNBC-LDPS study population         | 28.1 (21.6-35.8) | 4.3 (3.2-5.5) | 1.1 (0.8-1.4) | 0.5 (0.4-0.6) |
| DNBC sample <sup>a</sup>           | 27.4 (20.4-35.6) | 4.0 (3.0-5.4) | 0.9 (0.7-1.2) | 0.4 (0.3-0.6) |
| U.S. NHANES 1999-2000 <sup>b</sup> | 27.9 (20.3-37.3) | 5.2 (3.8-7.1) | 1.8 (1.0-3.3) | 0.3 (0.4-0.7) |

<sup>a</sup> Liew et al. 2014. Sample comprised live-born singleton births.

<sup>b</sup> Calafat et al. 2007. PFASs concentrations reported for adults age 20-39.

Abbreviations: LDPS, Lifestyle during pregnancy study; DNBC, Danish National Birth Cohort; NHANES, The National Health and Nutrition Examination Survey; PFAS, perfluoroalkyl substances; PFOS, perfluorooctane sulfonate; PFOA, perfluorooctanoic acid; PFHxS, perfluorohexan sulfonate; PFNA, perfluorononanoic acid.

**Table S3 Distributions of selected PFASs by study characteristics in the LDPS-DNBC cohort (N=1,592)**

|                                                                 | N     | Median and 25th-75th percentiles (ng/ml) |               |               |               |
|-----------------------------------------------------------------|-------|------------------------------------------|---------------|---------------|---------------|
|                                                                 |       | PFOS                                     | PFOA          | PFHxS         | PFNA          |
| <b>Child's sex</b>                                              |       |                                          |               |               |               |
| Female                                                          | 761   | 27.9 (21.3-35.8)                         | 4.3 (3.2-5.5) | 1.1 (0.8-1.4) | 0.5 (0.4-0.6) |
| Male                                                            | 831   | 28.3 (22.0-35.8)                         | 4.3 (3.1-5.5) | 1.1 (0.8-1.3) | 0.5 (0.4-0.6) |
| <b>Parity</b>                                                   |       |                                          |               |               |               |
| 0                                                               | 801   | 30.2 (23.4-37.9)                         | 5.0 (4.0-6.1) | 1.2 (0.9-1.5) | 0.5 (0.4-0.6) |
| 1                                                               | 511   | 26.0 (20.6-33.9)                         | 3.5 (2.7-4.6) | 0.9 (0.7-1.2) | 0.5 (0.4-0.6) |
| >1                                                              | 280   | 26.6 (21.1-33.4)                         | 3.3 (2.5-4.3) | 0.9 (0.6-1.2) | 0.4 (0.4-0.5) |
| <b>Maternal age at child birth (years)</b>                      |       |                                          |               |               |               |
| ≤ 24                                                            | 139   | 31.1 (23.2-39.9)                         | 5.0 (4.0-6.0) | 1.0 (0.8-1.4) | 0.4 (0.4-0.6) |
| 25-29                                                           | 562   | 29.4 (22.5-37.3)                         | 4.5 (3.4-5.8) | 1.1 (0.8-1.4) | 0.5 (0.4-0.6) |
| 30-34                                                           | 617   | 27.8 (21.9-34.8)                         | 4.2 (3.0-5.3) | 1.1 (0.8-1.4) | 0.5 (0.4-0.6) |
| ≥ 35                                                            | 274   | 26.0 (19.5-32.6)                         | 3.7 (2.7-4.8) | 1.0 (0.7-1.3) | 0.5 (0.4-0.6) |
| <b>Socio-economic status (SES)<sup>a</sup></b>                  |       |                                          |               |               |               |
| High                                                            | 1131  | 27.7 (21.1-34.6)                         | 4.3 (3.1-5.5) | 1.1 (0.8-1.4) | 0.5 (0.4-0.6) |
| Medium                                                          | 412   | 29.2 (24.2-38.7)                         | 4.3 (3.2-5.6) | 1.0 (0.8-1.3) | 0.5 (0.4-0.6) |
| Low                                                             | 43    | 26.3 (20.0-39.7)                         | 3.7 (2.7-5.1) | 0.9 (0.7-1.2) | 0.4 (0.4-0.5) |
| <b>Maternal alcohol consumption during pregnancy</b>            |       |                                          |               |               |               |
| Never                                                           | 756   | 28.1 (21.5-36.0)                         | 4.3 (3.2-5.5) | 1.0 (0.7-1.4) | 0.5 (0.4-0.6) |
| 1-4 glass per week                                              | 655   | 28.6 (22.2-35.9)                         | 4.3 (3.1-5.6) | 1.1 (0.8-1.4) | 0.5 (0.4-0.6) |
| more than 4 glasses per week                                    | 181   | 27.3 (20.8-35.1)                         | 4.1 (3.1-5.3) | 1.1 (0.8-1.3) | 0.5 (0.4-0.6) |
| <b>Maternal smoking during pregnancy</b>                        |       |                                          |               |               |               |
| No                                                              | 1,097 | 28.6 (21.5-36.5)                         | 4.3 (3.1-5.5) | 1.1 (0.7-1.4) | 0.5 (0.4-0.6) |
| Yes                                                             | 495   | 27.3 (22.0-34.4)                         | 4.3 (3.2-5.5) | 1.1 (0.8-1.4) | 0.5 (0.4-0.6) |
| <b>Maternal pre-pregnancy body mass index (BMI)<sup>a</sup></b> |       |                                          |               |               |               |
| <18.5                                                           | 61    | 27.5 (19.2-32.9)                         | 4.3 (2.7-5.7) | 1.2 (0.8-1.4) | 0.5 (0.4-0.6) |
| 18.5-24.9                                                       | 1,091 | 27.7 (21.2-34.7)                         | 4.3 (3.1-5.5) | 1.1 (0.8-1.4) | 0.5 (0.4-0.6) |
| 25.0-29.9                                                       | 294   | 30.3 (23.8-38.6)                         | 4.2 (3.2-5.5) | 1.1 (0.8-1.4) | 0.5 (0.4-0.6) |
| ≥30                                                             | 116   | 30.9 (23.3-41.2)                         | 4.4 (3.3-5.6) | 1.0 (0.8-1.3) | 0.5 (0.4-0.6) |
| <b>Maternal IQ<sup>a</sup></b>                                  |       |                                          |               |               |               |
| < 85                                                            | 239   | 29.9 (23.8-38.4)                         | 4.6 (3.3-5.6) | 1.1 (0.8-1.4) | 0.5 (0.4-0.6) |
| 85-115                                                          | 1083  | 28.3 (21.9-35.9)                         | 4.3 (3.2-5.6) | 1.1 (0.8-1.4) | 0.5 (0.4-0.6) |
| > 115                                                           | 261   | 25.1 (19.6-32.1)                         | 3.9 (2.8-5.1) | 1.0 (0.8-1.4) | 0.5 (0.4-0.6) |
| <b>Gestational week of blood draw<sup>a</sup></b>               |       |                                          |               |               |               |
| <8 weeks                                                        | 664   | 28.1 (22.0-35.9)                         | 4.5 (3.3-5.7) | 1.1 (0.8-1.4) | 0.5 (0.4-0.6) |
| ≥8 weeks                                                        | 793   | 28.7 (21.9-35.9)                         | 4.2 (3.1-5.4) | 1.1 (0.8-1.4) | 0.5 (0.4-0.6) |

<sup>a</sup> The missing values for maternal IQ, gestational week of blood draw, socio-economic status, and pre-pregnancy BMI are 0.4%, 8.5%, 0.01%, 1.9% respectively.

Abbreviations: LDPS, Lifestyle during pregnancy study; DNBC, Danish National Birth Cohort; PFAS, perfluoroalkyl substances; PFOS, perfluorooctane sulfonate; PFOA, perfluorooctanoic acid; PFHxS, perfluorohexan sulfonate; PFNA, perfluorononanoic acid.

**Table S4. Adjusted difference of child IQ scores at age five according to prenatal PFAS (per natural-log ng/ml increase), stratified by parity**

| PFAS                                           | Adjusted difference ( $\beta$ and 95% CI) |                  |                     |                  |                     |                  |
|------------------------------------------------|-------------------------------------------|------------------|---------------------|------------------|---------------------|------------------|
|                                                | Full Scale IQ                             |                  | Verbal IQ           |                  | Performance IQ      |                  |
|                                                | Nulliparous (N=801)                       | Parous (N=791)   | Nulliparous (N=801) | Parous (N=791)   | Nulliparous (N=801) | Parous (N=791)   |
| <b>Per 1 natural-log unit (ng/ml) increase</b> |                                           |                  |                     |                  |                     |                  |
| <b>PFOS</b>                                    | -0.6 (-4.4, 3.2)                          | -1.0 (-4.6, 2.5) | 0.8 (-3.4, 5.0)     | -1.4 (-4.9, 2.1) | -1.5 (-5.1, 2.1)    | -0.4 (-4.2, 3.4) |
| <b>PFOA</b>                                    | 0.6 (-4.1, 5.3)                           | -1.0 (-4.0, 2.1) | 1.0 (-4.1, 6.1)     | -2.1 (-5.3, 1.0) | 0.2 (-4.1, 4.5)     | 0.1 (-3.1, 3.3)  |
| <b>PFHxS</b>                                   | -0.3 (-4.2, 3.6)                          | -0.1 (-2.6, 2.3) | -0.5 (-4.1, 3.1)    | -0.4 (-3.0, 2.1) | -0.4 (-4.1, 3.3)    | 0.2 (-2.3, 2.8)  |
| <b>PFNA</b>                                    | 2.0 (-1.8, 5.8)                           | -0.3 (-3.3, 2.7) | 5.8 (2.1, 9.6)      | 1.0 (-1.9, 4.0)  | -1.3 (-5.2, 2.7)    | -1.2 (-4.1, 1.8) |
| <b>PFHpS</b>                                   | -0.2 (-3.5, 3.0)                          | -0.2 (-3.0, 2.6) | 0.9 (-2.7, 4.5)     | -0.4 (-3.1, 2.3) | -1.3 (-4.4, 1.8)    | 0.1 (-3.0, 3.1)  |
| <b>PFDA</b>                                    | -0.1 (-3.3, 3.1)                          | 0.6 (-1.8, 3.1)  | 2.4 (-1.2, 5.9)     | 1.8 (-0.9, 4.4)  | -1.9 (-5.0, 1.2)    | -0.4 (-2.6, 1.8) |
| <b>PFOSA</b>                                   | -0.4 (-1.5, 0.8)                          | -0.2 (-1.7, 1.4) | -0.7 (-2.1, 0.7)    | -0.6 (-2.2, 1.0) | 0.0 (-1.0, 1.0)     | 0.2 (-1.3, 1.7)  |

Note: Multivariable linear regression modeling was used to estimate the expected difference in IQ scores. Models were adjusted for maternal age at child birth, parity, maternal socio-economic status, maternal IQ, maternal smoking during pregnancy, maternal alcohol consumption during pregnancy, maternal pre-pregnancy BMI, and gestational week of blood draw. Abbreviations: CI, confidence interval; IQ, intelligence quotient; PFAS, perfluoroalkyl substances; PFOS, perfluorooctane sulfonate; PFOA, perfluorooctanoic acid; PFHxS, perfluorohexan sulfonate; PFNA, perfluorononanoic acid; PFHpS, perfluoroheptane sulfonate; PFDA, perfluorodecanoic acid; PFOSA, perfluorooctanesulfonic acid.



**Table S5. Adjusted difference of child IQ scores at age five according to prenatal PFAS (per natural-log ng/ml increase), stratified by maternal socio-economic status (SES)**

| PFAS                                           | Adjusted difference ( $\beta$ and 95% CI) |                  |                  |                  |                   |                  |
|------------------------------------------------|-------------------------------------------|------------------|------------------|------------------|-------------------|------------------|
|                                                | Full Scale IQ                             |                  | Verbal IQ        |                  | Performance IQ    |                  |
|                                                | High SES                                  | Medium/Low       | High SES         | Medium/Low       | High SES          | Medium/Low       |
| <b>Per 1 natural-log unit (ng/ml) increase</b> |                                           |                  |                  |                  |                   |                  |
| <b>PFOS</b>                                    | -1.1 (-4.0, 1.8)                          | 0.0 (-5.1, 5.2)  | -0.9 (-3.8, 2.0) | 0.6 (-4.9, 6.1)  | -0.9 (-4.0, 2.2)  | -0.6 (-5.5, 4.3) |
| <b>PFOA</b>                                    | 0.2 (-2.7, 3.1)                           | -0.7 (-5.8, 4.4) | -0.8 (-3.8, 2.1) | -1.1 (-6.4, 4.1) | 1.0 (-2.0, 4.0)   | -0.6 (-5.3, 4.2) |
| <b>PFHxS</b>                                   | 0.5 (-1.7, 2.6)                           | -2.4 (-7.1, 2.3) | -0.1 (-2.4, 2.1) | -2.4 (-7.3, 2.4) | 0.9 (-1.2, 3.1)   | -2.2 (-6.5, 2.1) |
| <b>PFNA</b>                                    | -1.2 (-3.7, 1.4)                          | 2.8 (-0.4, 5.9)  | 0.7 (-1.9, 3.3)  | 5.4 (2.3, 8.5)   | -2.2 (-5.1, 0.6)  | 0.2 (-3.0, 3.3)  |
| <b>PFHpS</b>                                   | -0.5 (-2.9, 1.9)                          | 1.0 (-2.9, 4.8)  | -0.1 (-2.4, 2.2) | 0.4 (-3.9, 4.8)  | -0.6 (-3.3, 2.0)  | 0.7 (-2.9, 4.3)  |
| <b>PFDA</b>                                    | -2.0 (-4.5, 0.5)                          | 2.0 (-0.5, 4.6)  | -0.1 (-2.9, 2.6) | 3.4 (0.3, 6.5)   | -2.9 (-5.4, -0.3) | 0.3 (-1.8, 2.4)  |
| <b>PFOSA</b>                                   | -0.4 (-1.5, 0.7)                          | -0.1 (-1.8, 1.6) | -0.9 (-2.0, 0.3) | -0.3 (-2.3, 1.7) | 0.0 (-1.1, 1.1)   | 0.1 (-1.3, 1.4)  |

Note: Multivariable linear regression modeling was used to estimate the expected difference in IQ scores. Models were adjusted for maternal age at child birth, parity, maternal socio-economic status, maternal IQ, maternal smoking during pregnancy, maternal alcohol consumption during pregnancy, maternal pre-pregnancy BMI, and gestational week of blood draw. Abbreviations: CI, confidence interval; IQ, intelligence quotient; PFAS, perfluoroalkyl substances; PFOS, perfluorooctane sulfonate; PFOA, perfluorooctanoic acid; PFHxS, perfluorohexan sulfonate; PFNA, perfluorononanoic acid; PFHpS, perfluoroheptane sulfonate; PFDA, perfluorodecanoic acid; PFOSA, perfluorooctanesulfonic acid.

**Table S6 Mean differences in IQ scores in 1,592 children at age five according to prenatal PFAS level quartiles**

| PFAS quartiles<br>(unit in ng/ml) | N   | Full Scale IQ              | Verbal IQ        | Performance IQ   |
|-----------------------------------|-----|----------------------------|------------------|------------------|
|                                   |     | Mean difference and 95% CI |                  |                  |
| <b>PFOS</b>                       |     |                            |                  |                  |
| 2.36 - 21.60                      | 400 | ref                        | ref              | ref              |
| 21.61 - 28.10                     | 399 | -0.4 (-3.2, 2.5)           | -1.0 (-3.9, 1.9) | 0.6 (-2.3, 3.5)  |
| 28.11 - 35.80                     | 398 | 1.1 (-1.8, 4.0)            | -0.2 (-3.3, 2.9) | 1.6 (-1.2, 4.5)  |
| ≥ 35.81                           | 395 | -0.5 (-3.5, 2.6)           | -0.7 (-3.9, 2.4) | -0.1 (-3.1, 2.8) |
| p-trend                           |     | 0.87                       | 0.76             | 0.93             |
| <b>PFOA</b>                       |     |                            |                  |                  |
| 0.61 - 3.15                       | 402 | Ref                        | ref              | ref              |
| 3.16 - 4.28                       | 397 | 2.4 (-0.3, 5.1)            | 2.5 (-0.4, 5.4)  | 1.6 (-1.2, 4.3)  |
| 4.29 - 5.49                       | 397 | -0.2 (-3.2, 2.9)           | -2.1 (-5.1, 1.0) | 1.0 (-2.1, 4.1)  |
| ≥ 5.50                            | 396 | 0.3 (-3.0, 3.6)            | -0.6 (-3.9, 2.7) | 0.5 (-2.8, 3.7)  |
| p-trend                           |     | 0.79                       | 0.29             | 0.88             |
| <b>PFHxS</b>                      |     |                            |                  |                  |
| <LLOQ - 0.76                      | 398 | ref                        | ref              | ref              |
| 0.77- 1.07                        | 410 | -1.4 (-4.2, 1.5)           | -1.1 (-4.2, 1.9) | -1.1 (-4.0, 1.8) |
| 1.08 - 1.38                       | 386 | -0.3 (-3.1, 2.5)           | -0.6 (-3.4, 2.1) | 0.2 (-2.7, 3.2)  |
| ≥ 1.39                            | 398 | -1.7 (-5.0, 1.6)           | -1.6 (-4.8, 1.7) | -1.4 (-4.6, 1.8) |
| p-trend                           |     | 0.42                       | 0.4              | 0.55             |
| <b>PFNA</b>                       |     |                            |                  |                  |
| <LLOQ - 0.36                      | 414 | ref                        | ref              | ref              |
| 0.37 - 0.46                       | 412 | 1.2 (-1.6, 4.0)            | 1.2 (-1.7, 4.2)  | 0.7 (-2.1, 3.5)  |
| 0.47 - 0.57                       | 381 | 3.0 (0.4, 5.6)             | 3.5 (0.8, 6.2)   | 1.9 (-0.9, 4.6)  |
| ≥ 0.58                            | 385 | -0.2 (-3.3, 2.9)           | 2.0 (-1.1, 5.0)  | -1.7 (-4.8, 1.3) |
| p-trend                           |     | 0.95                       | 0.16             | 0.29             |
| <b>PFHpS</b>                      |     |                            |                  |                  |
| <LLOQ - 0.27                      | 413 | ref                        | ref              | ref              |
| 0.28 - 0.37                       | 383 | 1.6 (-1.1, 4.3)            | 1.0 (-1.9, 3.9)  | 1.6 (-1.2, 4.3)  |
| 0.38 - 0.49                       | 413 | 1.1 (-1.8, 4.0)            | -0.7 (-3.7, 2.2) | 1.8 (-1.2, 4.8)  |
| ≥ 0.50                            | 383 | -0.5 (-3.6, 2.6)           | -0.2 (-3.4, 2.9) | -0.7 (-3.7, 2.3) |
| p-trend                           |     | 0.58                       | 0.69             | 0.52             |
| <b>PFDA</b>                       |     |                            |                  |                  |
| <LLOQ - 0.14                      | 523 | ref                        | ref              | ref              |
| 0.15 - 0.17                       | 304 | 1.1 (-2.0, 4.1)            | 0.1 (-3.0, 3.3)  | 1.2 (-1.7, 4.2)  |
| 0.18 - 0.22                       | 398 | -0.3 (-3.2, 2.6)           | 1.0 (-1.9, 3.9)  | -1.1 (-4.0, 1.8) |
| ≥ 0.23                            | 367 | 0.2 (-2.4, 2.8)            | 2.5 (-0.2, 5.1)  | -1.7 (-4.4, 1.1) |
| p-trend                           |     | 0.98                       | 0.06             | 0.15             |
| <b>PFOSA</b>                      |     |                            |                  |                  |
| <LLOQ - 1.38                      | 398 | ref                        | ref              | ref              |
| 1.39 - 2.32                       | 398 | 0.2 (-2.6, 3.0)            | -0.6 (-3.5, 2.2) | 1.2 (-1.7, 4.0)  |
| 2.33 - 4.16                       | 399 | 0.1 (-2.7, 2.9)            | -1.4 (-4.5, 1.7) | 1.3 (-1.4, 3.9)  |
| ≥ 4.17                            | 397 | -0.7 (-3.8, 2.5)           | -1.9 (-5.3, 1.4) | 0.7 (-2.3, 3.8)  |
| p-trend                           |     | 0.62                       | 0.25             | 0.83             |

Note: Multivariable linear regression modeling was used to estimate the mean difference in IQ scores. Models were adjusted for maternal age at child birth, parity, maternal socio-economic status, maternal IQ, maternal smoking during pregnancy, maternal alcohol consumption during pregnancy, maternal pre-pregnancy BMI, and gestational week of blood draw. P-trend was modeled based on the midpoint of each category. Abbreviations: CI, confidence interval; IQ, intelligence quotient; PFAS, perfluoroalkyl substances; PFOS, perfluorooctane sulfonate; PFOA, perfluorooctanoic acid; PFHxS, perfluorohexan sulfonate; PFNA, perfluorononanoic acid; PFHpS, perfluoroheptane sulfonate; PFDA, perfluorodecanoic acid; PFOSA, perfluorooctanesulfonic acid.

**Table S7. Adjusted difference of child IQ scores according to prenatal PFAS (per natural-log ng/ml increase), comparing models accounting for selection factors**

| PFAS                                           | Adjusted difference ( $\beta$ and 95% CI) |                      |                      |                      |                      |                      |
|------------------------------------------------|-------------------------------------------|----------------------|----------------------|----------------------|----------------------|----------------------|
|                                                | Full Scale IQ                             |                      | Verbal IQ            |                      | Performance IQ       |                      |
|                                                | Model 1 <sup>a</sup>                      | Model 2 <sup>b</sup> | Model 1 <sup>a</sup> | Model 2 <sup>b</sup> | Model 1 <sup>a</sup> | Model 2 <sup>b</sup> |
| <b>Per 1 natural-log unit (ng/ml) increase</b> |                                           |                      |                      |                      |                      |                      |
| <b>PFOS</b>                                    | -0.7 (-3.3, 1.9)                          | -1.0 (-3.7, 1.6)     | -0.4 (-3.1, 2.2)     | -0.9 (-3.5, 1.7)     | -0.7 (-3.4, 1.9)     | -0.9 (-3.6, 1.8)     |
| <b>PFOA</b>                                    | -0.1 (-2.7, 2.4)                          | -0.1 (-2.5, 2.3)     | -1.1 (-3.7, 1.6)     | -1.2 (-3.7, 1.3)     | 0.5 (-2.1, 3.0)      | 0.6 (-1.9, 3.1)      |
| <b>PFHxS</b>                                   | -0.1 (-2.1, 2.0)                          | 0.2 (-1.8, 2.3)      | -0.6 (-2.7, 1.5)     | -0.2 (-2.3, 1.8)     | 0.3 (-1.7, 2.3)      | 0.5 (-1.5, 2.5)      |
| <b>PFNA</b>                                    | 0.4 (-1.9, 2.8)                           | 0.0 (-2.2, 2.2)      | 2.3 (0.1, 4.5)       | 1.8 (-0.3, 4.0)      | -1.1 (-3.5, 1.3)     | -1.3 (-3.6, 1.0)     |
| <b>PFHpS</b>                                   | -0.1 (-2.2, 2.0)                          | -0.2 (-2.4, 1.9)     | 0.0 (-2.0, 2.1)      | -0.2 (-2.2, 1.9)     | -0.2 (-2.4, 1.9)     | -0.3 (-2.5, 2.0)     |
| <b>PFDA</b>                                    | 0.3 (-1.7, 2.2)                           | -0.2 (-2.1, 1.6)     | 1.6 (-0.5, 3.8)      | 1.1 (-0.9, 3.2)      | -0.9 (-2.7, 0.9)     | -1.2 (-3.0, 0.5)     |
| <b>PFOSA</b>                                   | -0.2 (-1.2, 0.7)                          | -0.3 (-1.2, 0.6)     | -0.5 (-1.6, 0.6)     | -0.6 (-1.7, 0.4)     | 0.0 (-0.8, 0.9)      | 0.1 (-0.8, 0.9)      |

<sup>a</sup> Model 1: IPW accounted for the probabilities of sampling and selection in the LDPS

<sup>b</sup> Model 2: IPW accounted for probability of sampling according to each alcohol intake category at baseline only

Note: Multivariable linear regression modeling was used to estimate the expected difference in IQ scores. Models were adjusted for maternal age at child birth, parity, maternal socio-economic status, maternal IQ, maternal smoking during pregnancy, maternal alcohol consumption during pregnancy, maternal pre-pregnancy BMI, and gestational week of blood draw. Abbreviations: CI, confidence interval; IQ, intelligence quotient; PFAS, perfluoroalkyl substances; PFOS, perfluorooctane sulfonate; PFOA, perfluorooctanoic acid; PFHxS, perfluorohexan sulfonate; PFNA, perfluorononanoic acid; PFHpS, perfluoroheptane sulfonate; PFDA, perfluorodecanoic acid; PFOSA, perfluorooctanesulfonic acid.

**Table S8. Adjusted difference of child IQ scores at age five according to prenatal PFAS (per natural-log ng/ml increase), additionally adjusting for birth year**

| PFAS                                           | Adjusted difference ( $\beta$ and 95% CI) |                      |                      |                      |                      |                      |
|------------------------------------------------|-------------------------------------------|----------------------|----------------------|----------------------|----------------------|----------------------|
|                                                | Full Scale IQ                             |                      | Verbal IQ            |                      | Performance IQ       |                      |
|                                                | Model 1 <sup>a</sup>                      | Model 2 <sup>b</sup> | Model 1 <sup>a</sup> | Model 2 <sup>b</sup> | Model 1 <sup>a</sup> | Model 2 <sup>b</sup> |
| <b>Per 1 natural-log unit (ng/ml) increase</b> |                                           |                      |                      |                      |                      |                      |
| <b>PFOS</b>                                    | -0.9 (-3.5, 1.7)                          | -0.8 (-3.4, 1.8)     | -0.3 (-3.0, 2.3)     | -0.2 (-2.8, 2.4)     | -1.1 (-3.8, 1.5)     | -1.1 (-3.7, 1.5)     |
| <b>PFOA</b>                                    | -0.5 (-2.9, 2.0)                          | -0.5 (-3.0, 2.0)     | -0.9 (-3.5, 1.7)     | -0.8 (-3.5, 1.8)     | -0.1 (-2.7, 2.4)     | -0.3 (-2.8, 2.3)     |
| <b>PFHxS</b>                                   | -0.1 (-2.2, 1.9)                          | -0.1 (-2.2, 1.9)     | -0.6 (-2.7, 1.6)     | -0.5 (-2.6, 1.6)     | 0.1 (-1.9, 2.1)      | 0.1 (-1.9, 2.0)      |
| <b>PFNA</b>                                    | 0.7 (-1.7, 3.2)                           | 0.6 (-1.9, 3.1)      | 2.3 (-0.1, 4.6)      | 2.3 (-0.1, 4.6)      | -0.6 (-3.0, 1.8)     | -0.8 (-3.2, 1.7)     |
| <b>PFHpS</b>                                   | -0.2 (-2.2, 1.9)                          | -0.1 (-2.2, 2.0)     | 0.1 (-2.0, 2.2)      | 0.2 (-1.9, 2.3)      | -0.4 (-2.6, 1.7)     | -0.4 (-2.6, 1.8)     |
| <b>PFDA</b>                                    | 0.5 (-1.5, 2.5)                           | 0.5 (-1.6, 2.5)      | 1.6 (-0.7, 3.8)      | 1.6 (-0.6, 3.8)      | -0.5 (-2.3, 1.3)     | -0.6 (-2.4, 1.3)     |
| <b>PFOSA</b>                                   | -0.5 (-1.5, 0.4)                          | -0.5 (-1.5, 0.4)     | -0.5 (-1.7, 0.7)     | -0.5 (-1.6, 0.7)     | -0.4 (-1.3, 0.4)     | -0.4 (-1.2, 0.4)     |

<sup>a</sup> Model 1: adjusted for a continuous birth year variable in addition to the covariates listed below

<sup>b</sup> Model 2: adjusted for a categorical birth year variable in addition to the covariates listed below

Note: Multivariable linear regression modeling was used to estimate the expected difference in IQ scores. Models were adjusted for maternal age at child birth, parity, maternal socio-economic status, maternal IQ, maternal smoking during pregnancy, maternal alcohol consumption during pregnancy, maternal pre-pregnancy BMI, and gestational week of blood draw. Abbreviations: CI, confidence interval; IQ, intelligence quotient; PFAS, perfluoroalkyl substances; PFOS, perfluorooctane sulfonate; PFOA, perfluorooctanoic acid; PFHxS, perfluorohexan sulfonate; PFNA, perfluorononanoic acid; PFHpS, perfluoroheptane sulfonate; PFDA, perfluorodecanoic acid; PFOSA, perfluorooctanesulfonic acid.

**Table S9. Adjusted difference of child IQ scores at age five according to prenatal PFAS (per natural-log ng/ml increase), excluding blood samples that were subjected to processing delay**

| PFAS                                           | Adjusted difference ( $\beta$ and 95% CI) |                      |                      |                      |                      |                      |
|------------------------------------------------|-------------------------------------------|----------------------|----------------------|----------------------|----------------------|----------------------|
|                                                | Full Scale IQ                             |                      | Verbal IQ            |                      | Performance IQ       |                      |
|                                                | Model 1 <sup>a</sup>                      | Model 2 <sup>b</sup> | Model 1 <sup>a</sup> | Model 2 <sup>b</sup> | Model 1 <sup>a</sup> | Model 2 <sup>b</sup> |
| <b>Per 1 natural-log unit (ng/ml) increase</b> |                                           |                      |                      |                      |                      |                      |
| <b>PFOS</b>                                    | -0.7 (-3.3, 1.9)                          | -0.7 (-3.4, 1.9)     | -0.4 (-3.1, 2.2)     | -0.3 (-3.1, 2.5)     | -0.7 (-3.4, 1.9)     | -0.9 (-3.6, 1.8)     |
| <b>PFOA</b>                                    | -0.1 (-2.7, 2.4)                          | -0.1 (-2.7, 2.5)     | -1.1 (-3.7, 1.6)     | -0.9 (-3.7, 1.8)     | 0.5 (-2.1, 3.0)      | 0.5 (-2.1, 3.1)      |
| <b>PFHxS</b>                                   | -0.1 (-2.1, 2.0)                          | -0.2 (-2.4, 2.0)     | -0.6 (-2.7, 1.5)     | -0.8 (-3.1, 1.4)     | 0.3 (-1.7, 2.3)      | 0.2 (-1.9, 2.3)      |
| <b>PFNA</b>                                    | 0.4 (-1.9, 2.8)                           | 0.4 (-2.0, 2.9)      | 2.3 (0.1, 4.5)       | 2.5 (0.2, 4.8)       | -1.1 (-3.5, 1.3)     | -1.2 (-3.7, 1.3)     |
| <b>PFHpS</b>                                   | -0.1 (-2.2, 2.0)                          | -0.2 (-2.3, 2.0)     | 0.0 (-2.0, 2.1)      | 0.1 (-2.1, 2.3)      | -0.2 (-2.4, 1.9)     | -0.4 (-2.6, 1.8)     |
| <b>PFDA</b>                                    | 0.3 (-1.7, 2.2)                           | 0.2 (-1.8, 2.3)      | 1.6 (-0.5, 3.8)      | 1.7 (-0.5, 3.9)      | -0.9 (-2.7, 0.9)     | -1.0 (-2.9, 0.9)     |
| <b>PFOSA</b>                                   | -0.2 (-1.2, 0.7)                          | -0.5 (-1.6, 0.6)     | -0.5 (-1.6, 0.6)     | -0.9 (-2.0, 0.3)     | 0.0 (-0.8, 0.9)      | 0.0 (-1.0, 1.0)      |

<sup>a</sup> Model 1: Full cohort (N=1,592)

<sup>b</sup> Model 2: Excluded 101 samples that were subjected to processing delay (> 48 hours)

Note: Multivariable linear regression modeling was used to estimate the expected difference in IQ scores. Models were adjusted for maternal age at child birth, parity, maternal socio-economic status, maternal IQ, maternal smoking during pregnancy, maternal alcohol consumption during pregnancy, maternal pre-pregnancy BMI, and gestational week of blood draw. Abbreviations: CI, confidence interval; IQ, intelligence quotient; PFAS, perfluoroalkyl substances; PFOS, perfluorooctane sulfonate; PFOA, perfluorooctanoic acid; PFHxS, perfluorohexan sulfonate; PFNA, perfluorononanoic acid; PFHpS, perfluoroheptane sulfonate; PFDA, perfluorodecanoic acid; PFOSA, perfluorooctanesulfonic acid.

## REFERENCE

Liew Z, Ritz B, Bonefeld-Jorgensen EC, Henriksen TB, Nohr EA, Bech BH, et al. 2014. Prenatal exposure to perfluoroalkyl substances and the risk of congenital cerebral palsy in children. *Am J Epidemiol* 180:574-581.

Calafat AM, Kuklennyik Z, Reidy JA, Caudill SP, Tully JS, Needham LL. 2007. Serum concentrations of 11 polyfluoroalkyl compounds in the U.S. Population: Data from the national health and nutrition examination survey (nhanes). *Environ Sci Technol* 41:2237-2242.
